# Supplementary material for: Toxicity Evaluation of Quantum Dots (ZnS and CdS) Singly and Combined in Zebrafish (Danio rerio)
Source: PubMed Central journal article supplement (PMC6981874; doi:10.3390/ijerph17010232), 2019-12-28
Supplement: ijerph-17-00232-s001.pdf [file ijerph-17-00232-s001.pdf]

**Table S1.** Results from ICP-AES analysis for Zn and Cd in water samples following centrifugation.

| Assay                            | Element Analysed ( $\mu\text{g/L}$ ) |                  |
|----------------------------------|--------------------------------------|------------------|
|                                  | Zn                                   | Cd               |
| Control                          | $1.89 \pm 0.49$                      | <LOQ             |
| 10 $\mu\text{g}$ ZnS/L           | $4.12 \pm 0.89$                      | -                |
| 100 $\mu\text{g}$ ZnS/L          | $70.99 \pm 1.85$                     | -                |
| 1000 $\mu\text{g}$ ZnS/L         | $16.34 \pm 1.35$                     | -                |
| 10 $\mu\text{g}$ CdS/L           | -                                    | $5.43 \pm 0.53$  |
| 100 $\mu\text{g}$ CdS/L          | -                                    | $10.60 \pm 0.76$ |
| 1000 $\mu\text{g}$ CdS/L         | -                                    | $24.51 \pm 0.57$ |
| 10 $\mu\text{g}$ (ZnS + CdS)/L   | $6.50 \pm 0.34$                      | $3.44 \pm 0.61$  |
| 100 $\mu\text{g}$ (ZnS + CdS)/L  | $8.53 \pm 1.22$                      | $6.44 \pm 1.24$  |
| 1000 $\mu\text{g}$ (ZnS + CdS)/L | $24.37 \pm 0.70$                     | $3.91 \pm 0.63$  |

LOD: Cd (0.6  $\mu\text{g/L}$ ); Zn (0.3  $\mu\text{g/L}$ ). LOQ: Cd (2.0  $\mu\text{g/L}$ ); Zn (1.0  $\mu\text{g/L}$ ). n = 3
